# Supplementary material for: Testing the Reciprocal Effect between Value of Education, Time Investment, and Academic Achievement in a Large Non-Western Sample
Source: MDPI journal article supplement (doi:10.3390/jintelligence11070133), 2023-07-04
Supplement: s1 [file s1]

## Supplementary Materials

### Section S1: Factor analysis of motivational variables

This section will provide the factor analysis of 17 motivational items in the questionnaire. We conduct factor analysis in all five waves, found that 4 motivational items are included in one factor, which is our motivational variable: value of education.

**Table S1.** Codes of motivational questionnaire

|          |                                                                                                                                |
|----------|--------------------------------------------------------------------------------------------------------------------------------|
| q12a01w1 | It is essential to get higher education for self-development                                                                   |
| q1202w1  | It is essential to get higher education in order to get a job                                                                  |
| q1203w1  | It is essential to get higher education in order to get ideal spouse                                                           |
| q1204w1  | Getting higher education provides better opportunities for making good friends                                                 |
| q1205w1  | People treat me better if I have higher education                                                                              |
| q1206w1  | Junior high school dropouts or people only with junior high school diploma receive serious discrimination in our society       |
| q1207w1  | I would like to get into social world earlier than others                                                                      |
| q1208w1  | I would like to earn money earlier than others                                                                                 |
| q1209w1  | It is likely to earn more money with several part-time jobs rather than with one full-time job                                 |
| q1210w1  | I would like to become a freelancer since I do not want to be forced to follow rules and structure for firms and organizations |
| q1211w1  | Junior high school dropouts or people only with junior high school diploma are very unlikely to get a job                      |

|         |                                                                                                                                      |
|---------|--------------------------------------------------------------------------------------------------------------------------------------|
| q1212w1 | I do not know much about my competencies and personal traits to make a career decision                                               |
| q1213w1 | I do not know my career options because I do not have enough information                                                             |
| q1214w1 | Even though I know quite a lot about careers, I am attracted to a number of them, so it is difficult for me to choose one among them |
| q1215w1 | I constantly make changes in my career plan                                                                                          |
| q1216w1 | I find it difficult to make a career plan because of the differences between my parents and myself regarding my career plan          |
| q1217w1 | It is meaningless to set a career plan now because I do not know what the future will be like                                        |
| a1218w1 | In setting a career plan, I tend to follow my parents' recommendations more than my own opinion                                      |

*Note.* Each code corresponds to a question in the KYPS's questionnaire, and in this study we focus on four questions: q12a01w1, q12a02w1, q12a03w1 and q12a04w1. This four motivational question are included in one factor in all waves, below is the results:

## Factor Analysis

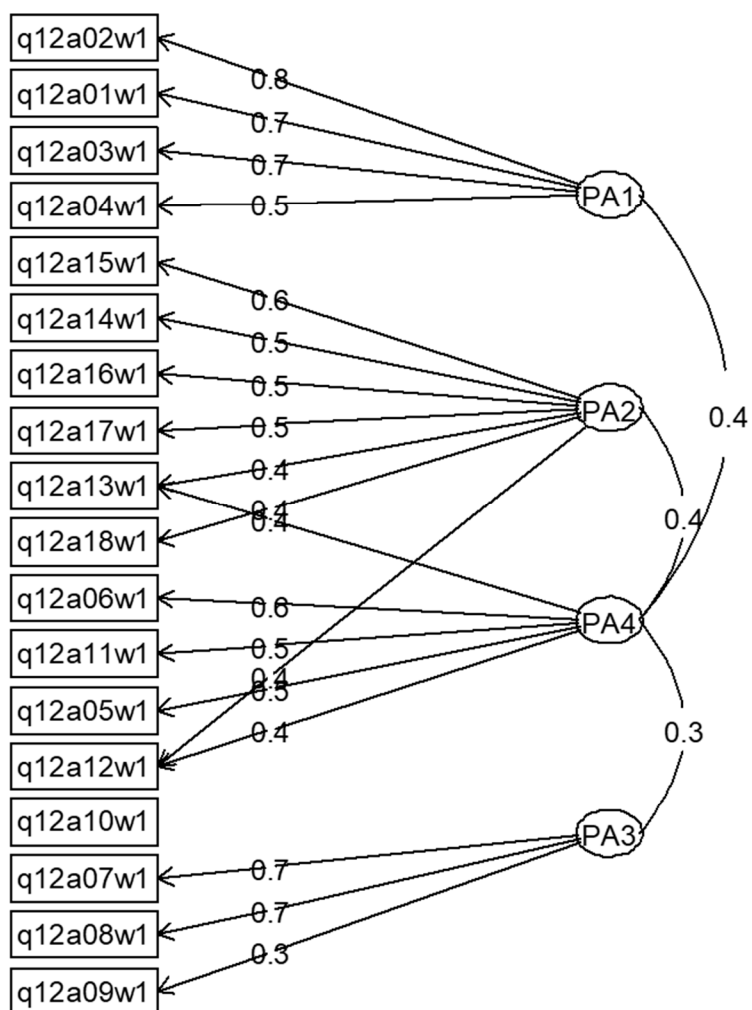

**Figure S1.** The factor analysis of 17 motivational items in wave 1.

## Factor Analysis

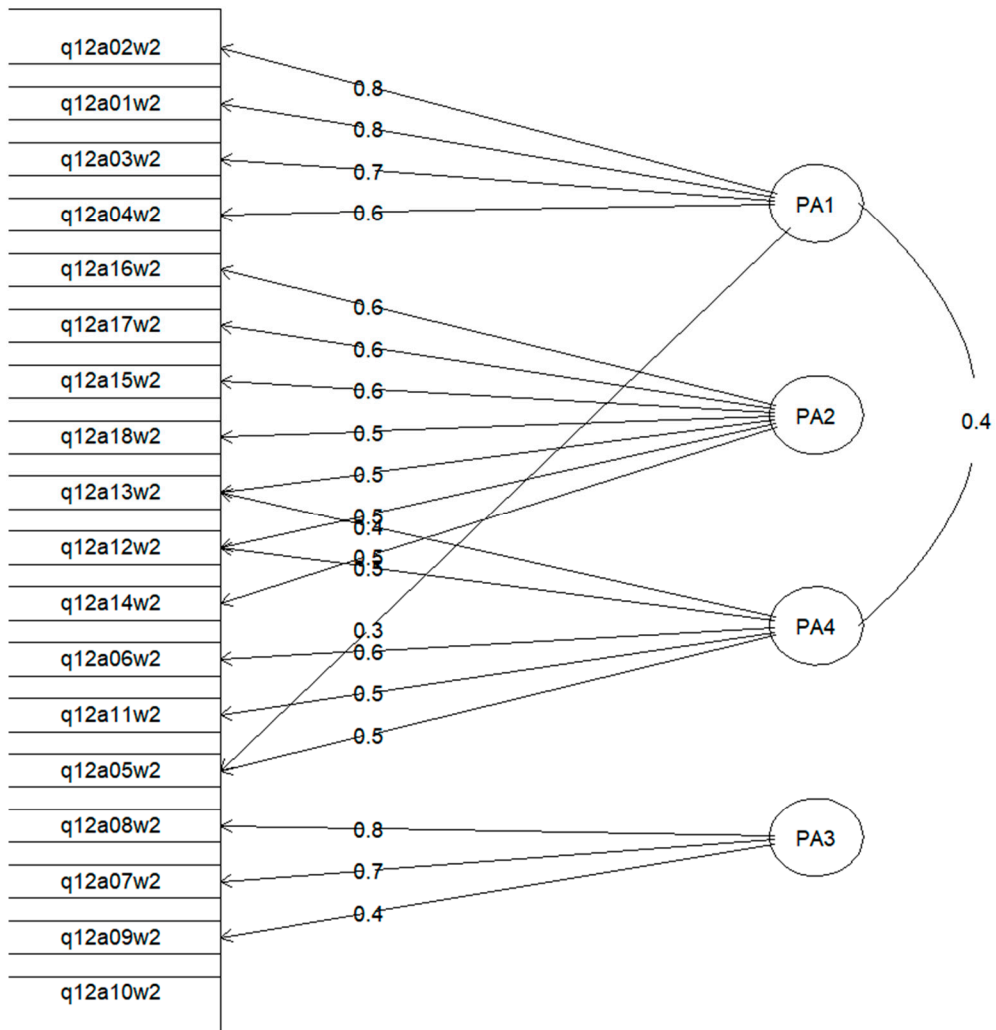

**Figure S2.** The factor analysis of 17 motivational items in wave 2.

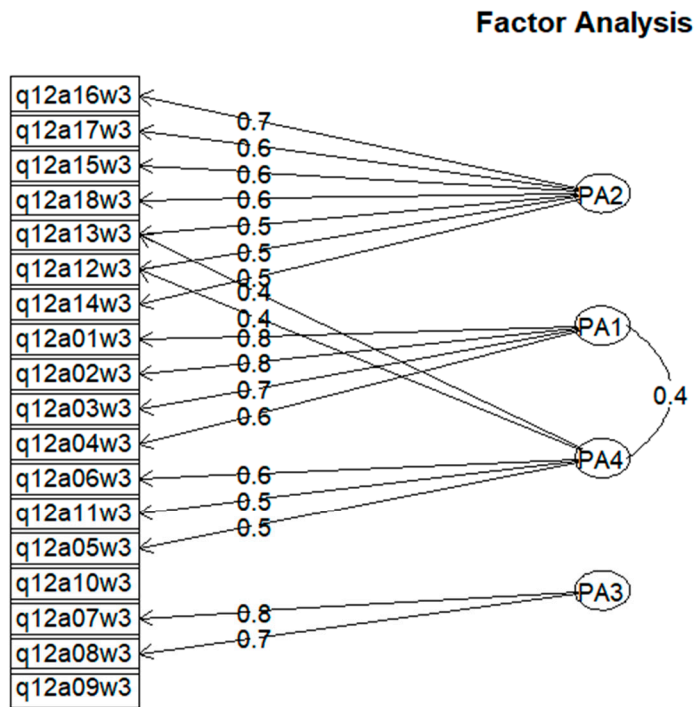

**Figure S3.** The factor analysis of 17 motivational items in wave 3.

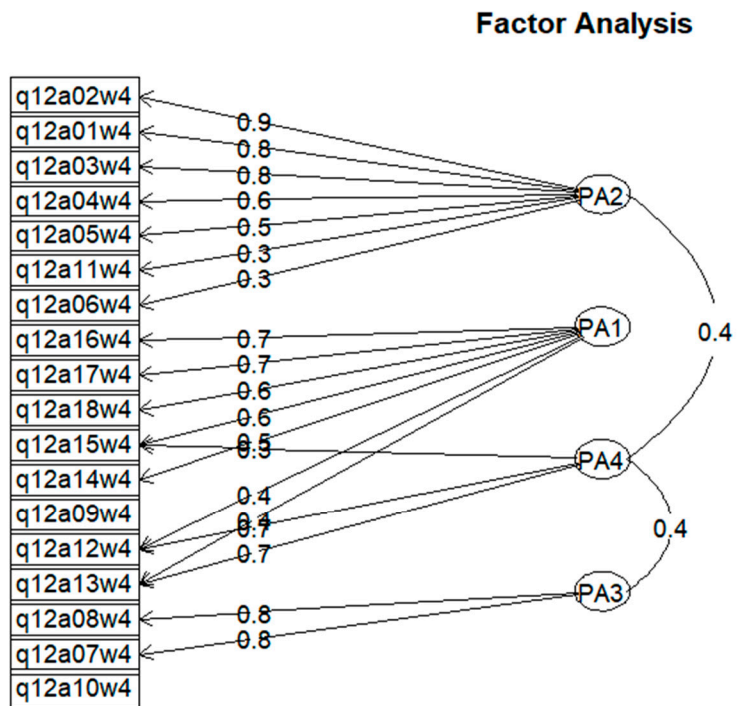

**Figure S4.** The factor analysis of 17 motivational items in wave 4.

## Factor Analysis

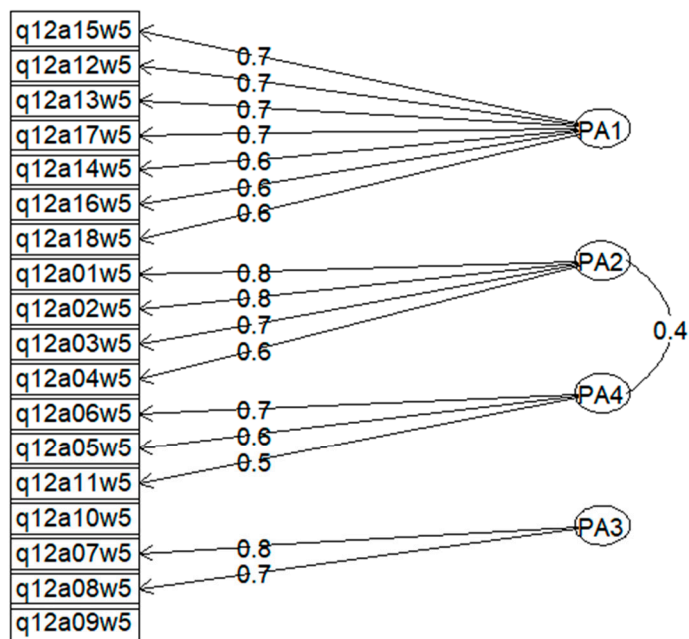

**Figure S5.** The factor analysis of 17 motivational items in wave 5.

## Section S2: Multiple imputation results

This section will provide all multiple imputation results in 10 times in two achievement indicators (class rank and self-rated performance).

**Table S2.** 10 times imputation on CLPM in rank.

|       | DF | AIC   | BIC   | Chisq  | Chisq diff | Df diff |
|-------|----|-------|-------|--------|------------|---------|
| fit1  | 46 | 37125 | 37242 | 2143.8 |            |         |
| fit2  | 46 | 37186 | 37303 | 2125.9 | -17.804    | 0       |
| fit3  | 46 | 37041 | 37158 | 2204.3 | 78.32      | 0       |
| fit4  | 46 | 37080 | 37197 | 2133.5 | -70.804    | 0       |
| fit5  | 46 | 37193 | 37310 | 2108.8 | -24.645    | 0       |
| fit6  | 46 | 36994 | 37111 | 2172.3 | 63.47      | 0       |
| fit7  | 46 | 36996 | 37113 | 2121.6 | -50.662    | 0       |
| fit8  | 46 | 37025 | 37142 | 2122.4 | 0.776      | 0       |
| fit9  | 46 | 37190 | 37306 | 2141.6 | 19.194     | 0       |
| fit10 | 46 | 37207 | 37323 | 2187.3 | 45.725     | 0       |

*Note.* Fit1-10 represents 10 times imputation under CLPM

**Table S3.** 10 times imputation on RI-CLPM in rank measures

|       | DF | AIC   | BIC   | Chisq  | Chisq diff | Df diff |
|-------|----|-------|-------|--------|------------|---------|
| fit1  | 43 | 36277 | 36412 | 1288.8 |            |         |
| fit2  | 43 | 36322 | 36458 | 1256.2 | -32.647    | 0       |
| fit3  | 43 | 36148 | 36284 | 1305.5 | 49.385     | 0       |
| fit4  | 43 | 36224 | 36359 | 1271.9 | -33.609    | 0       |
| fit5  | 43 | 36319 | 36454 | 1228.8 | -43.137    | 0       |
| fit6  | 43 | 36136 | 36271 | 1308.3 | 79.464     | 0       |
| fit7  | 43 | 36164 | 36300 | 1284   | -24.294    | 0       |
| fit8  | 43 | 36151 | 36286 | 1241.5 | -42.467    | 0       |
| fit9  | 43 | 36329 | 36464 | 1275.1 | 33.638     | 0       |
| fit10 | 43 | 36320 | 36455 | 1295   | 19.871     | 0       |

*Note.* Fit11-20 represents 10 times imputation under RI-CLPM



**Table S4.** 10 times imputation on RC-CLPM in rank measures

|       | DF | AIC   | BIC   | Chisq  | Chisq diff | Df diff |
|-------|----|-------|-------|--------|------------|---------|
| fit21 | 40 | 35854 | 36008 | 860.64 |            |         |
| fit22 | 40 | 35919 | 36072 | 846.34 | -14.297    | 0       |
| fit23 | 40 | 35712 | 35865 | 862.98 | 16.638     | 0       |
| fit24 | 40 | 35820 | 35974 | 861.87 | -1.112     | 0       |
| fit25 | 40 | 35886 | 36040 | 789.68 | -72.186    | 0       |
| fit26 | 40 | 35645 | 35799 | 811.73 | 22.052     | 0       |
| fit27 | 40 | 35725 | 35879 | 838.74 | 27.006     | 0       |
| fit28 | 40 | 35741 | 35895 | 826.06 | -12.682    | 0       |
| fit29 | 40 | 35875 | 36028 | 814.65 | -11.412    | 0       |
| fit30 | 40 | 35907 | 36061 | 876.08 | 61.439     | 0       |

*Note.* Fit21-30 represents 10 times imputation under RC-CLPM

**Table S5.** 10 times imputation on tri-variate RI-CLPM in rank measures

|       | DF | AIC    | BIC    | Chisq  | Chisq diff | Df diff |
|-------|----|--------|--------|--------|------------|---------|
| fit31 | 94 | 177838 | 178090 | 2003.4 |            |         |
| fit32 | 94 | 178102 | 178354 | 1973.6 | -29.849    | 0       |
| fit33 | 94 | 178672 | 178924 | 2019.5 | 45.934     | 0       |
| fit34 | 94 | 177374 | 177626 | 2014.3 | -5.229     | 0       |
| fit35 | 94 | 178274 | 178526 | 1948.5 | -65.805    | 0       |
| fit36 | 94 | 177697 | 177949 | 2056.9 | 108.451    | 0       |
| fit37 | 94 | 178014 | 178266 | 1998.1 | -58.865    | 0       |
| fit38 | 94 | 177955 | 178207 | 1969.4 | -28.62     | 0       |
| fit39 | 94 | 178393 | 178645 | 1932.8 | -36.68     | 0       |
| fit40 | 94 | 178476 | 178728 | 2041.8 | 109.075    | 0       |

*Note.* Fit31-40 represents 10 times imputation under tri-variate RI-CLPM

**Table S6.** 10 times imputation on CLPM in self-rated performance measures.

|       | DF | AIC   | BIC   | Chisq  | Chisq diff | Df diff |
|-------|----|-------|-------|--------|------------|---------|
| fit1  | 46 | 73584 | 73701 | 2060   |            |         |
| fit2  | 46 | 73510 | 73626 | 2020.6 | -39.416    | 0       |
| fit3  | 46 | 73534 | 73651 | 2043.5 | 22.89      | 0       |
| fit4  | 46 | 73307 | 73423 | 1969.6 | -73.911    | 0       |
| fit5  | 46 | 73362 | 73478 | 2011.1 | 41.545     | 0       |
| fit6  | 46 | 73410 | 73526 | 2075.4 | 64.271     | 0       |
| fit7  | 46 | 73426 | 73543 | 2033.7 | -41.702    | 0       |
| fit8  | 46 | 73446 | 73563 | 2162.2 | 128.512    | 0       |
| fit9  | 46 | 73556 | 73673 | 2104   | -58.19     | 0       |
| fit10 | 46 | 73473 | 73589 | 2054.8 | -49.188    | 0       |

*Note.* Fit1-10 represents 10 times imputation under CLPM.

**Table S7.** 10 times imputation on RI-CLPM in self-rated performance measures.

|       | DF | AIC   | BIC   | Chisq   | Chisq diff | Df diff |
|-------|----|-------|-------|---------|------------|---------|
| fit11 | 43 | 72558 | 72693 | 1027.71 |            |         |
| fit12 | 43 | 72509 | 72644 | 1013.55 | -14.162    | 0       |
| fit13 | 43 | 72518 | 72653 | 1021.53 | 7.985      | 0       |
| fit14 | 43 | 72331 | 72466 | 987.55  | -33.984    | 0       |
| fit15 | 43 | 72376 | 72512 | 1019.86 | 32.308     | 0       |
| fit16 | 43 | 72381 | 72516 | 1040.91 | 21.058     | 0       |
| fit17 | 43 | 72415 | 72550 | 1015.99 | -24.928    | 0       |
| fit18 | 43 | 72388 | 72523 | 1098.28 | 82.29      | 0       |
| fit19 | 43 | 72489 | 72624 | 1031.28 | -66.995    | 0       |
| fit20 | 43 | 72459 | 72594 | 1035.34 | 4.058      | 0       |

*Note.* Fit11-20 represents 10 times imputation under RI-CLPM.

**Table S8.** 10 times imputation on RC-CLPM in self-rated performance measures.

|       | DF | AIC   | BIC   | Chisq  | Chisq diff | Df diff |
|-------|----|-------|-------|--------|------------|---------|
| fit21 | 40 | 72317 | 72470 | 780.74 |            |         |
| fit22 | 40 | 72297 | 72451 | 795.8  | 15.057     | 0       |
| fit23 | 40 | 72268 | 72422 | 765.34 | -30.46     | 0       |
| fit24 | 40 | 72134 | 72288 | 784.8  | 19.457     | 0       |
| fit25 | 40 | 72149 | 72303 | 786.46 | 1.665      | 0       |
| fit26 | 40 | 72135 | 72288 | 788.69 | 2.226      | 0       |
| fit27 | 40 | 72206 | 72360 | 801.77 | 13.083     | 0       |
| fit28 | 40 | 72143 | 72297 | 847.8  | 46.029     | 0       |
| fit29 | 40 | 72258 | 72412 | 794.16 | -53.639    | 0       |
| fit30 | 40 | 72259 | 72413 | 829.24 | 35.074     | 0       |

*Note.* Fit11-20 represents 10 times imputation under RC-CLPM.

**Table S9.** 10 times imputation on trivariate RI-CLPM in self-rated performance measures.

|       | DF | AIC    | BIC    | Chisq  | Chisq diff | Df diff |
|-------|----|--------|--------|--------|------------|---------|
| fit31 | 94 | 214118 | 214370 | 1609.9 |            |         |
| fit32 | 94 | 214310 | 214562 | 1611.9 | 2.042      | 0       |
| fit33 | 94 | 215060 | 215312 | 1622.9 | 11.009     | 0       |
| fit34 | 94 | 213503 | 213755 | 1599.5 | -23.417    | 0       |
| fit35 | 94 | 214338 | 214590 | 1623.5 | 24.008     | 0       |
| fit36 | 94 | 213981 | 214233 | 1687.8 | 64.28      | 0       |
| fit37 | 94 | 214282 | 214534 | 1605.6 | -82.17     | 0       |
| fit38 | 94 | 214230 | 214482 | 1724.1 | 118.452    | 0       |
| fit39 | 94 | 214584 | 214836 | 1597.7 | -126.398   | 0       |
| fit40 | 94 | 214606 | 214858 | 1619.7 | 21.994     | 0       |

*Note.* Fit21-30 represents 10 times imputation under on trivariate RI-CLPM.

**Table S10.** The distribution of missing data

|        | Motivation<br>(4 items) | Time investment<br>(12 items) | Class rank<br>(1 item) | Self-rated performance<br>(3 items) |
|--------|-------------------------|-------------------------------|------------------------|-------------------------------------|
| Wave 1 | 4.03%                   | 0.26%                         | 0.63%                  | 0                                   |
| Wave 2 | 10.03%                  | 7.57%                         | 5.5%                   | 7.68%                               |
| Wave 3 | 10.98%                  | 9.39%                         | 7.57%                  | 10.61%                              |
| Wave 4 | 10.41%                  | 9.51%                         | 9.68%                  | 12.32%                              |
| Wave 5 | 14.99%                  | 14.24%                        | 15.97%                 | 17.51%                              |

*Note.* If one construct included more than one item, then we reported the percentage of missing items for more than 2 items.

**Table S11:** The correlation between the average self-rated scores of five subjects, three subjects and class rank.

|      | X5a1  | X5a2  | X5a3  | X5a4  | X5a5  | aw1   | aw2   | aw3   | aw4   | aw5   | r1   | r2   | r3   | r4   | r5 |
|------|-------|-------|-------|-------|-------|-------|-------|-------|-------|-------|------|------|------|------|----|
| X5a1 | 1     |       |       |       |       |       |       |       |       |       |      |      |      |      |    |
| X5a2 | 0.74  | 1     |       |       |       |       |       |       |       |       |      |      |      |      |    |
| X5a3 | 0.43  | 0.46  | 1     |       |       |       |       |       |       |       |      |      |      |      |    |
| X5a4 | 0.33  | 0.36  | 0.49  | 1     |       |       |       |       |       |       |      |      |      |      |    |
| X5a5 | 0.38  | 0.38  | 0.43  | 0.5   | 1     |       |       |       |       |       |      |      |      |      |    |
| aw1  | 0.93  | 0.69  | 0.39  | 0.31  | 0.35  | 1     |       |       |       |       |      |      |      |      |    |
| aw2  | 0.72  | 0.93  | 0.4   | 0.32  | 0.35  | 0.74  | 1     |       |       |       |      |      |      |      |    |
| aw3  | 0.45  | 0.46  | 0.89  | 0.49  | 0.42  | 0.45  | 0.46  | 1     |       |       |      |      |      |      |    |
| aw4  | 0.4   | 0.41  | 0.56  | 0.83  | 0.5   | 0.4   | 0.41  | 0.6   | 1     |       |      |      |      |      |    |
| aw5  | 0.44  | 0.45  | 0.53  | 0.55  | 0.83  | 0.43  | 0.44  | 0.56  | 0.65  | 1     |      |      |      |      |    |
| r1   | -0.76 | -0.7  | -0.35 | -0.28 | -0.34 | -0.72 | -0.68 | -0.37 | -0.35 | -0.38 | 1    |      |      |      |    |
| r2   | -0.72 | -0.73 | -0.37 | -0.3  | -0.36 | -0.69 | -0.7  | -0.38 | -0.37 | -0.41 | 0.83 | 1    |      |      |    |
| r3   | -0.39 | -0.4  | -0.63 | -0.49 | -0.42 | -0.35 | -0.34 | -0.61 | -0.53 | -0.51 | 0.39 | 0.41 | 1    |      |    |
| r4   | -0.33 | -0.34 | -0.5  | -0.57 | -0.44 | -0.29 | -0.3  | -0.49 | -0.62 | -0.54 | 0.34 | 0.36 | 0.67 | 1    |    |
| r5   | -0.34 | -0.33 | -0.5  | -0.51 | -0.51 | -0.32 | -0.3  | -0.5  | -0.56 | -0.65 | 0.36 | 0.39 | 0.64 | 0.73 | 1  |

*Note.* x5a1-x5a5 refers to the average self-rated scores of five subjects across five waves. aw1-aw5 refer to the average self-rated scores of three subjects across five waves. aw1-aw5 refer to the average self-rated scores of three subjects across the five waves. r1-r5 refers to the class rank across the five waves.

**Table S12.** Parameter estimates from different models using data with complete cases.

| parameters                                                        | CLPM                             |                                  | RI-CLPM                          |                                  | RC-CLPM                          |                                  | 3 variable RI-CLPM                   |                               |                                  |
|-------------------------------------------------------------------|----------------------------------|----------------------------------|----------------------------------|----------------------------------|----------------------------------|----------------------------------|--------------------------------------|-------------------------------|----------------------------------|
| Autoregressive effects ( $\beta$ )                                | Value of education               | achievement                      | Value of education               | achievement                      | Value of education               | achievement                      | Value of education                   | Time investment               | achievement                      |
| (1)value of education and self-rated performance                  | 0.427***                         | 0.563***                         | 0.153***                         | 0.302***                         | 0.135***                         | 0.323***                         |                                      |                               |                                  |
| (2)value of education and class rank                              | 0.424***                         | 0.647***                         | 0.156***                         | 0.506***                         | 0.139***                         | 0.655***                         |                                      |                               |                                  |
| (3)value of education, time investment and self-rated performance |                                  |                                  |                                  |                                  |                                  |                                  | 0.168***                             | 1.292***                      | 0.356***                         |
| (4)value of education, time investment and class rank             |                                  |                                  |                                  |                                  |                                  |                                  | 0.175***                             | 1.359***                      | 0.628***                         |
| Cross-lagged effects ( $\gamma$ )                                 | Value of education → achievement | Achievement → Value of education | Value of education → achievement | Achievement → Value of education | Value of education → achievement | Achievement → Value of education | Value of education → time investment | Time investment → achievement | achievement → value of education |
| (1)value of education and self-rated performance                  | 0.049***                         | 0.214***                         | -0.002                           | 0.130***                         | 0.002                            | 0.095***                         |                                      |                               |                                  |



|                                                                   |                                    |                                    |           |                                    |                                        |                                 |          |          |                                    |
|-------------------------------------------------------------------|------------------------------------|------------------------------------|-----------|------------------------------------|----------------------------------------|---------------------------------|----------|----------|------------------------------------|
| (2)value of education and class rank                              | 0.010***                           | 0.568***                           | -0.007*** | 0.183***                           | 0.001                                  | 0.167*                          |          |          |                                    |
| (3)value of education, time investment and self-rated performance |                                    |                                    |           |                                    |                                        |                                 | 1.717*** | 0.008*** | 0.171***                           |
| (4)value of education, time investment and class rank             |                                    |                                    |           |                                    |                                        |                                 | 1.325*** | 0.003*** | 0.396***                           |
| Random effects and covariances                                    | Value of education and achievement | Value of education and achievement |           | Value of education and achievement | Value of education and time investment | Time investment and achievement |          |          | Achievement and value of education |
| Intercept                                                         |                                    |                                    |           |                                    |                                        |                                 |          |          |                                    |
| self-rated performance                                            |                                    |                                    | 0.130***  |                                    | 0.162***                               |                                 | 1.717*** | 1,763*** | 0.095***                           |
| class rank                                                        |                                    |                                    | 0.044***  |                                    | 0.061***                               |                                 | 1.498*** | 0.005    | 0.021***                           |
| Slope                                                             |                                    |                                    |           |                                    |                                        |                                 |          |          |                                    |
| self-rated performance                                            |                                    |                                    |           |                                    | 0.004***                               |                                 |          |          |                                    |
| class rank                                                        |                                    |                                    |           |                                    | 0.001**                                |                                 |          |          |                                    |
| Intercept and slope                                               |                                    |                                    |           |                                    |                                        |                                 |          |          |                                    |
| self-rated performance                                            |                                    |                                    |           |                                    | -0.022***                              |                                 |          |          |                                    |
| class rank                                                        |                                    |                                    |           |                                    | -0.009***                              |                                 |          |          |                                    |

---

*Note.* The complete dataset includes 1421 participants.

### **Section S3: codes of modelling**

This section provides R script for constructing three bivariate models and one trivariate RI-CLPM. Due to the length of codes, we upload it on github, which can be found in the website : [KYPS codes: This codes is for "Testing the reciprocal effect between value of education, time investment, and academic achievement in a large non-Western sample", we provide the codes for multiple imputation and model comparasion \(github.com\)](#)
